# Supplementary material for: Cloud droplet activation of mixed organic-sulfate particles produced by the photooxidation of isoprene
Source: Copernicus journal article supplement (doi:10.5194/acp-10-3953-2010), 2010-04-27
Supplement: Supplementary file 1 [file acp-10-3953-2010-supplement.pdf]

## Supplementary Information

**Figure S1.** Mean diameter of ammonium sulfate particles for increasing temperature in the thermodenuder (0.3 sLpm, 6-s residence time). Particles having an equivalent electric-mobility diameter of 80 nm were selected by a DMA<sub>2</sub> prior to evaporation.

**Figure S2.** CCN activation curves of particles passed through the thermodenuder at 25, 60, and 100 °C. DMA<sub>2</sub> is set to 100-nm mobility diameter (+1 charge equivalent), and the mode diameter decreases prior to CCNC measurement for particles passed at 60 and 100 °C because of partial evaporation (cf. Figs. 4 and 5). Experiment numbers are shown in the upper left-hand corner of the panels. Data (not shown) recorded for settings on DMA<sub>2</sub> of 80, 90, and 120 nm exhibit similar trends.

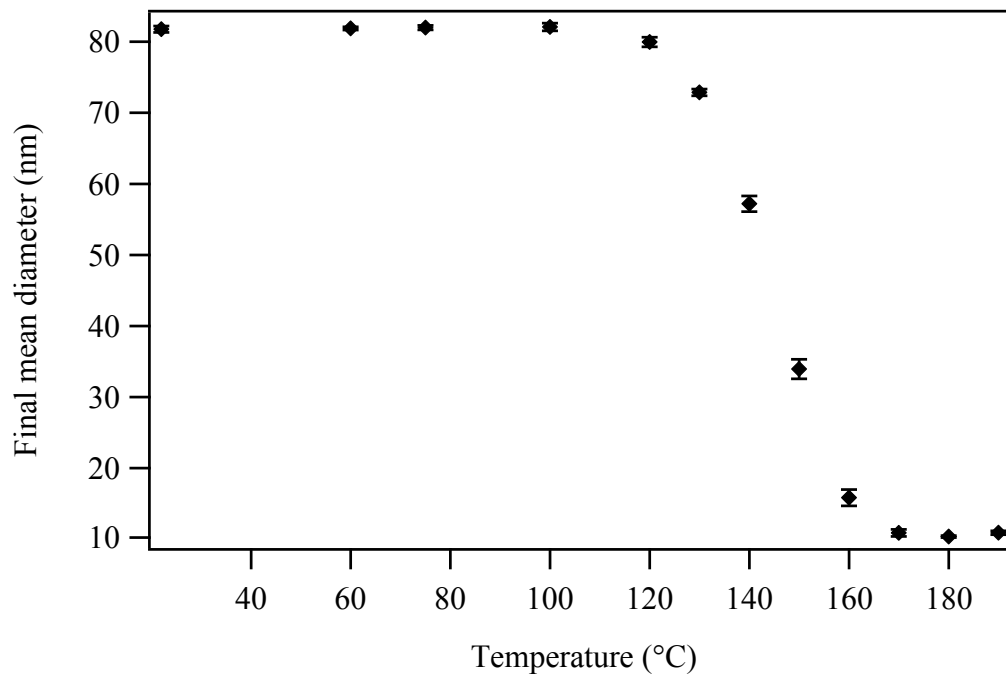

Figure S1.

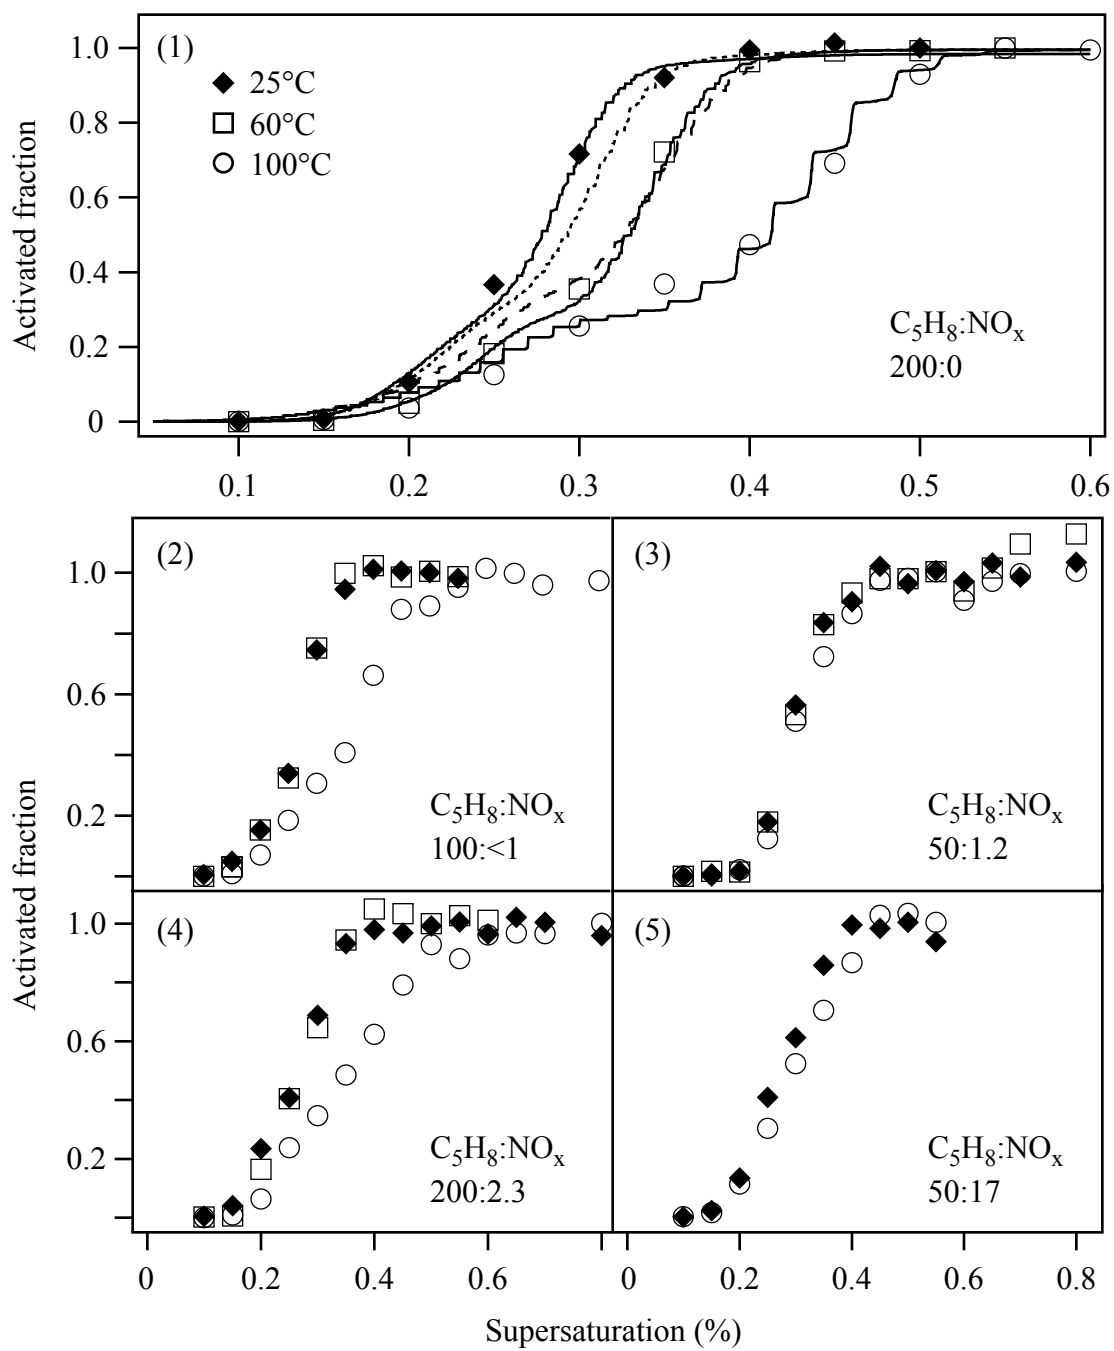

Figure S2.
